# Supplementary material
Source: PubMed Central journal article supplement (PMC9547000)
Supplement: 41598_2022_21456_MOESM1_ESM.pdf [file 41598_2022_21456_MOESM1_ESM.pdf]

# Facial EMG sensing for monitoring affect using a wearable device

## Supplementary Information

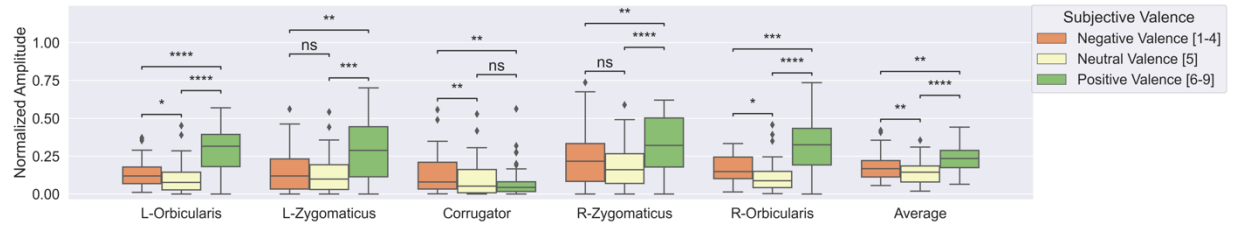

Figure S. 1. Wilcoxon signed-rank (paired) test with Bonferroni correction for videos with negative valence ratings (1-4) vs. videos with neutral valence ratings (rating 5) vs. videos with positive valence ratings (6-9), applied for each of the five sensors (left orbicularis, left zygomaticus, corrugator, right zygomaticus, and right orbicularis) and the average amplitude of all five sensors. Statistical significance annotations: \* if  $p \in [.05, 10^{-2})$ ; \*\* if  $p \in [10^{-2}, 10^{-3})$ ; \*\*\* if  $p \in [10^{-3}, 10^{-4})$ ; and \*\*\*\* if  $p \geq 10^{-4}$ .

Table S. 1. Demographic information for each participant in the study.

| Participant ID | Age | Gender | Participant ID | Age | Gender |
|----------------|-----|--------|----------------|-----|--------|
| 1              | 30  | female | 21             | 47  | male   |
| 2              | 31  | male   | 22             | 19  | female |
| 3              | 29  | male   | 23             | 18  | male   |
| 4              | 23  | female | 24             | 53  | female |
| 5              | 23  | female | 25             | 27  | male   |
| 6              | 24  | male   | 26             | 26  | male   |
| 7              | 29  | male   | 28             | 31  | female |
| 8              | 33  | male   | 29             | 47  | male   |
| 9              | 23  | male   | 30             | 59  | female |
| 11             | 27  | male   | 31             | 57  | male   |
| 12             | 24  | male   | 32             | 22  | male   |
| 13             | 18  | female | 33             | 29  | male   |
| 14             | 27  | female | 34             | 26  | male   |
| 15             | 35  | male   | 35             | 26  | male   |
| 16             | 68  | female | 36             | 54  | female |
| 17             | 64  | male   | 37             | 31  | female |
| 18             | 31  | male   | 38             | 34  | male   |
| 19             | 27  | female | 39             | 26  | male   |
| 20             | 55  | male   | 41             | 19  | female |

Table A. 2 List of selected video stimuli used in our study and corresponding validation studies.

| Video ID | Category | Name                        | Validation participants | Validation study    |
|----------|----------|-----------------------------|-------------------------|---------------------|
| 1        | Neutral  | neu_airport2                | 411, 82, 38             | [1] [2], this study |
| 2        | Neutral  | neu_cafe                    | 411, 82, 38             | [1] [2], this study |
| 3        | Neutral  | neu_assembly                | 411, 82, 38             | [1] [2], this study |
| 4        | Neutral  | neu_sanfran                 | 411, 82, 38             | [1] [2], this study |
| 5        | Neutral  | neu_cityinthenight          | 411, 82, 38             | [1] [2], this study |
| 6        | Negative | neg_crocbiteman             | 411, 82, 38             | [1] [2], this study |
| 7        | Negative | neg_bikefalloffcliff        | 411, 82, 38             | [1] [2], this study |
| 8        | Negative | neg_bullthrowandtrample     | 411, 82, 38             | [1] [2], this study |
| 9        | Negative | neg_carhitsskater           | 411, 82, 38             | [1] [2], this study |
| 10       | Negative | neg_breakdancerkickskid     | 411, 82, 38             | [1] [2], this study |
| 11       | Negative | neg_fish                    | 86, 38                  | [3], this study     |
| 12       | Neutral  | neu_pillow                  | 411, 82, 38             | [1] [2], this study |
| 13       | Neutral  | neu_ridingthetube2          | 411, 82, 38             | [1] [2], this study |
| 14       | Neutral  | neu_boydrinkingtea          | 411, 82, 38             | [1] [2], this study |
| 15       | Neutral  | neu_ridinginthetube1        | 411, 82, 38             | [1] [2], this study |
| 16       | Neutral  | neu_hikinginwood            | 411, 82, 38             | [1] [2], this study |
| 17       | Positive | pos_cat_icecream            | 38                      | This study          |
| 18       | Positive | pos_dog_nails               | 38                      | This study          |
| 19       | Positive | pos_pixar                   | 38                      | This study          |
| 20       | Positive | cat_outfit                  | 38                      | This study          |
| 21       | Positive | pos_catlamp                 | 38                      | This study          |
| 22       | Positive | pos_cat_door                | 38                      | This study          |
| 23       | Positive | pos_dogdownstairs           | 38                      | This study          |
| 24       | Positive | pos_bridelauphingduringvows | 411, 82, 38             | [1] [2], this study |
| 25       | Positive | pos_babydancebeyonce        | 411, 82, 38             | [1] [2], this study |

## References

1. Samson, AC, Kreibig, SD, Soderstrom, B, Wade, AA, & Gross, JJ, (2016), Eliciting positive, negative and mixed emotional states: A film library for affective scientists. *Cognition and Emotion*, **30(5)**, pp. 827-856, (2016).
2. Mavridou I, Balaguer-Ballester E, Seiss E, & Nduka C. Affective State Recognition in Virtual Reality from Electromyography and Photoplethysmography using Head-mounted Wearable Sensors. Doctorate Thesis, Bournemouth University. (2021).
3. Gnacek M., Mavridou I, Seiss E, Kostoulas T, Balaguer-Ballester E., Nduka C. "AVDOS -Affective Video Database Online Study." 2022, In: 10th International Conference on Affective Computing and Intelligent Interaction (ACII), Japan, 18-21 October, p:8, (2022).
